# Supplementary material for: Impact of weight maintenance and loss on diabetes risk and burden: a population-based study in 33,184 participants
Source: PubMed Central journal article supplement (PMC5294882; doi:10.1186/s12889-017-4081-6), 2017-02-06
Supplement: 12889_2017_4081_MOESM1_ESM.pdf [file 12889_2017_4081_MOESM1_ESM.pdf]

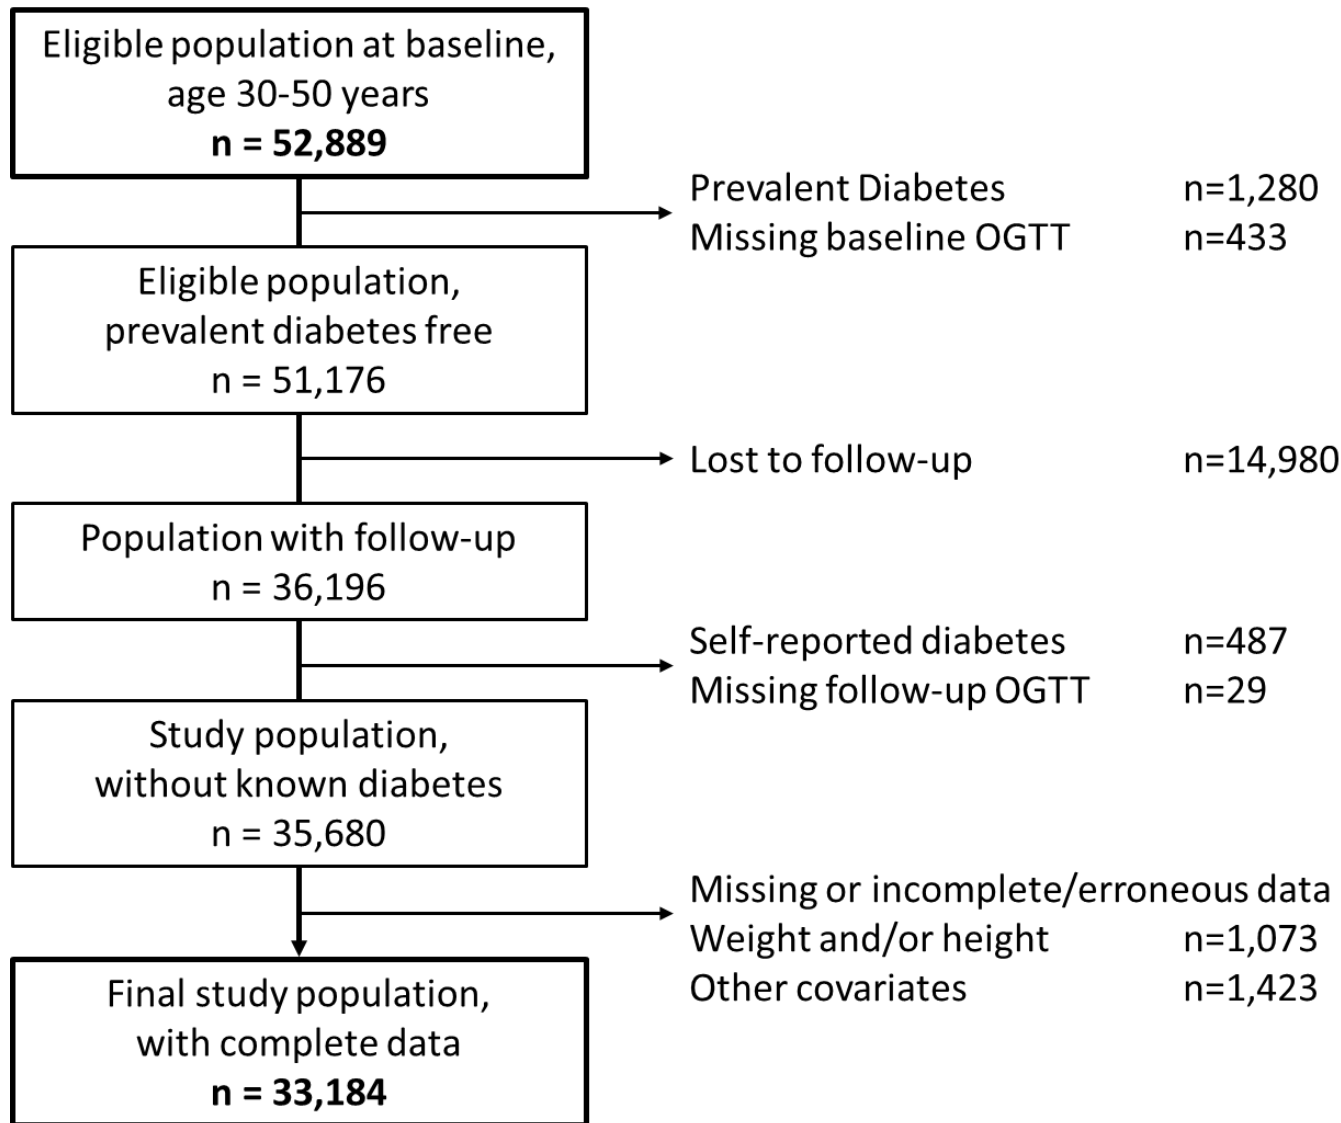

Supplemental figure: Flowchart describing study population. Västerbotten Intervention Programme 1990-2013. OGTT: Oral glucose tolerance test.
